# Supplementary material for: Positron Emission-Computed Tomography, Cryobiopsy versus Bronchoalveolar Lavage and Computed Tomography Findings for Interstitial Lung Disease: A Long-Term Follow-Up
Source: MDPI journal article supplement (doi:10.3390/medicina59040787), 2023-04-18

Binomial logistic fit of a multiple regression for cryobiopsy vs survival, change of disease diagnosis and drug administration and respiratory functions after forward selection of the most important parameters.

**Table S1. Whole Model Test.**

| Model                                                          | –LogLikelihood | DF | ChiSquare | Prob>ChiSq |
|----------------------------------------------------------------|----------------|----|-----------|------------|
| Difference                                                     | 14.388797      | 4  | 28.77759  | <0.0001    |
| Full                                                           | 41.062978      |    |           |            |
| Reduced                                                        | 55.451774      |    |           |            |
| In yellow: The change of diagnosis was statistical significant |                |    |           |            |
| AICc                                                           | 92.9368        |    |           |            |
| BIC                                                            | 104.036        |    |           |            |
| Observations                                                   | 80             |    |           |            |

**Table S2: Parameter Estimates**

| Term                                      | Estimate   | Std Error | ChiSquare | Prob>ChiSq |
|-------------------------------------------|------------|-----------|-----------|------------|
| Intercept                                 | –0.3718766 | 0.3607943 | 1.06      | 0.3027     |
| change in Diagnosis[0]                    | –1.0207919 | 0.3566797 | 8.19      | 0.0042     |
| survival[0]                               | –0.606382  | 0.2914361 | 4.33      | 0.0375     |
| CHANGE IN DRUGS[0]                        | –0.5943222 | 0.3522594 | 2.85      | 0.0916     |
| change in Diagnosis[0]*CHANGE IN DRUGS[0] | –1.0313838 | 0.3505591 | 8.66      | 0.0033     |

For log odds of 1/0, In yellow: The change of diagnosis was statistical significant; In red: The survival was positively associated with the change in diagnosis

**Table S3: Odds Ratios**

**Odds Ratios for change in Diagnosis**

| Level1 | Level2 | Odds Ratio | Prob>Chisq | –95% | +95%  |
|--------|--------|------------|------------|------|-------|
| 1      | 0      | 7.70       | 0.0042     | 1.90 | 31.18 |
| 0      | 1      | 0.13       | 0.0042     | 0.03 | 0.53  |

**Odds Ratios for survival**

| Level1 | /Level2 | Odds Ratio | Prob>Chisq | –95% | +95%  |
|--------|---------|------------|------------|------|-------|
| 1      | 0       | 3.36       | 0.0375     | 1.07 | 10.54 |
| 0      | 1       | 0.30       | 0.0375     | 0.09 | 0.93  |

**Odds Ratios for CHANGE IN DRUGS**

| Level1 | /Level2 | Odds Ratio | Prob>Chisq | –95% | +95%  |
|--------|---------|------------|------------|------|-------|
| 1      | 0       | 3.28       | 0.0916     | 0.83 | 13.06 |
| 0      | 1       | 0.30       | 0.0916     | 0.08 | 1.21  |

Normal approximations used for ratio confidence limits effects: change in Diagnosis survival CHANGE IN DRUGS. Tests and confidence intervals on odds ratios are Wald based. In red: The survival was positively associated with the change in diagnosis

Figure S1. Prediction profiler

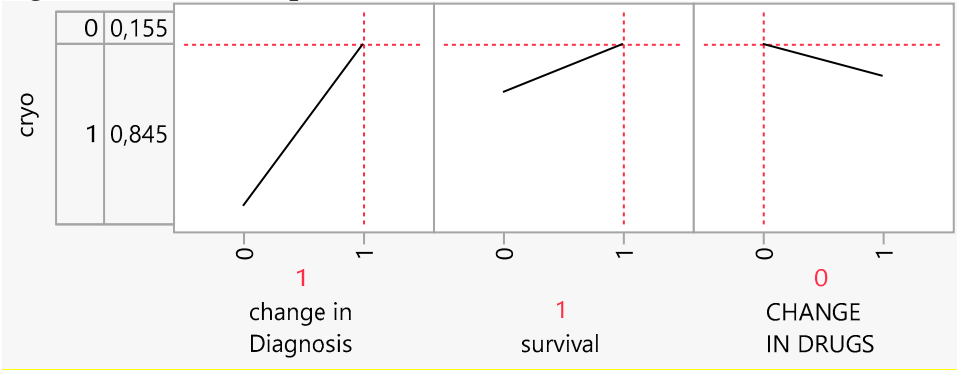

Figure S2. Interaction Profiles

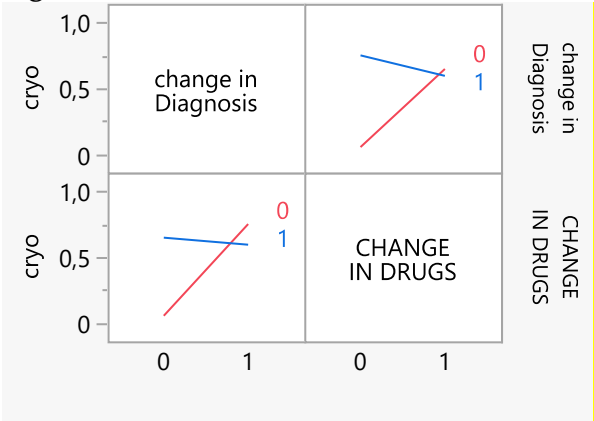

Figure S3. Studentized Deviance Residual by Predicted

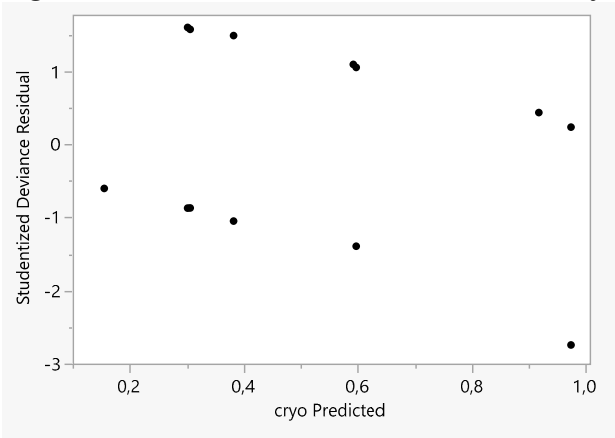

Supplement: s1 [file s1]
